# Supplementary material for: Differential Effects of Paraquat, Rotenone, and MPTP on Cellular Bioenergetics of Undifferentiated and Differentiated Human Neuroblastoma Cells
Source: MDPI journal article supplement (doi:10.3390/brainsci13121717), 2023-12-14
Supplement: s1 [file s1]

## Supplementary Data

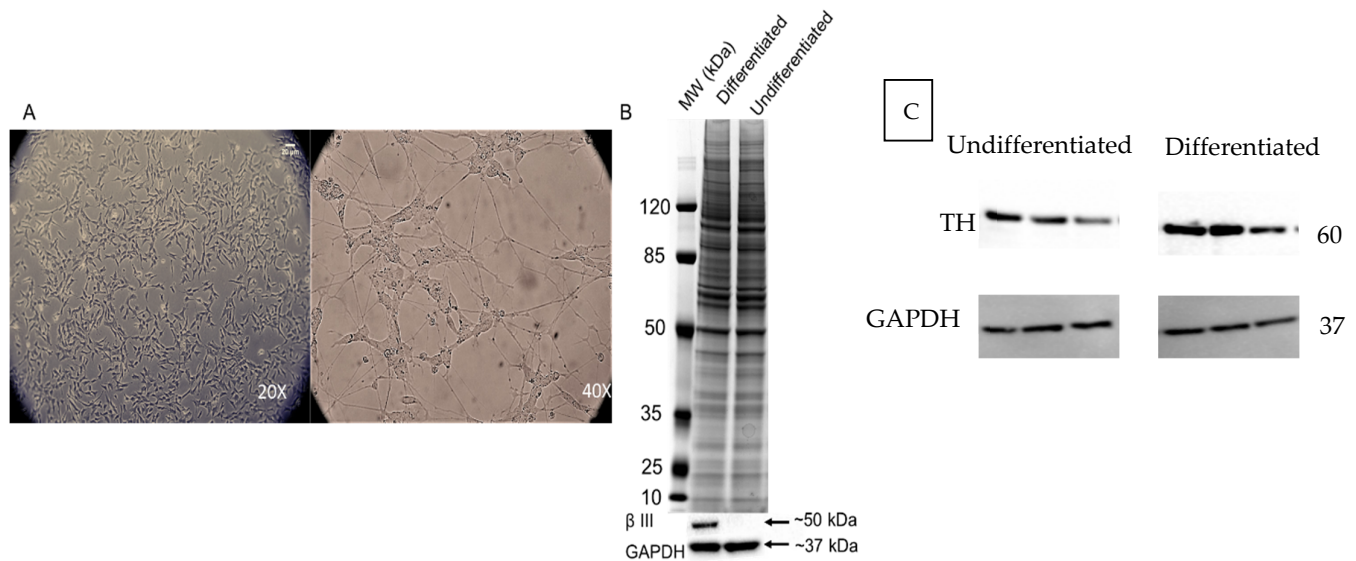

**Figure S1.** Comparison of undifferentiated and differentiated SH-SY5Y cells using microscopy and Western blotting. **(A)** Light microscopy of undifferentiated SH-SY5Y cells (left panel) or differentiated cells (right panel). Differentiated cells display cell body elongation and dendritic arborization (right panel). **(B)** Differentiated cells express neuronal markers including  $\beta$ -III tubulin. **(C)** Differentiated cells express increased levels of tyrosine hydroxylase (TH). GAPDH, Glyceraldehyde 3-phosphate dehydrogenase.

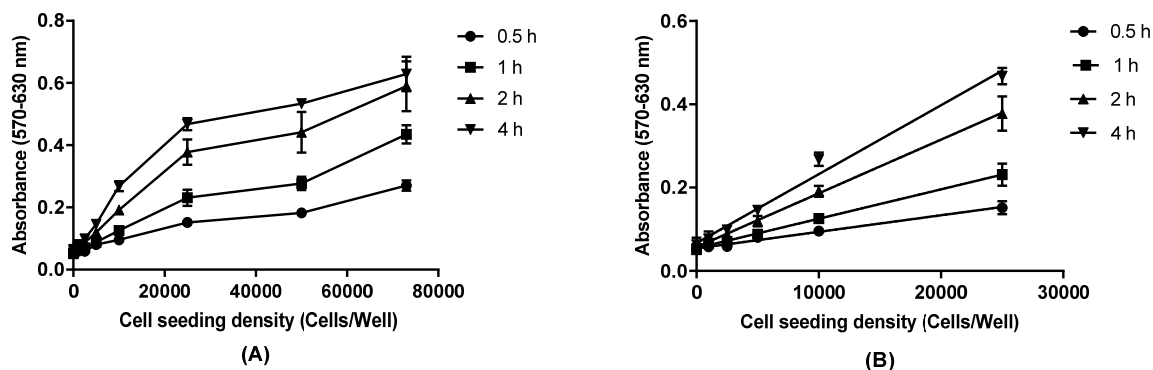

**Figure S2.** MTT assay optimization for SH-SY5Y cells. **(A)** MTT optimization to determine a linear correlation between the optical density signal and cell seeding density for SH-SY5Y cells after 0.5, 1, 2 and 4 hours. **(B)** Correlation of optical density readings with cell seeding numbers for SH-SY5Y cells.

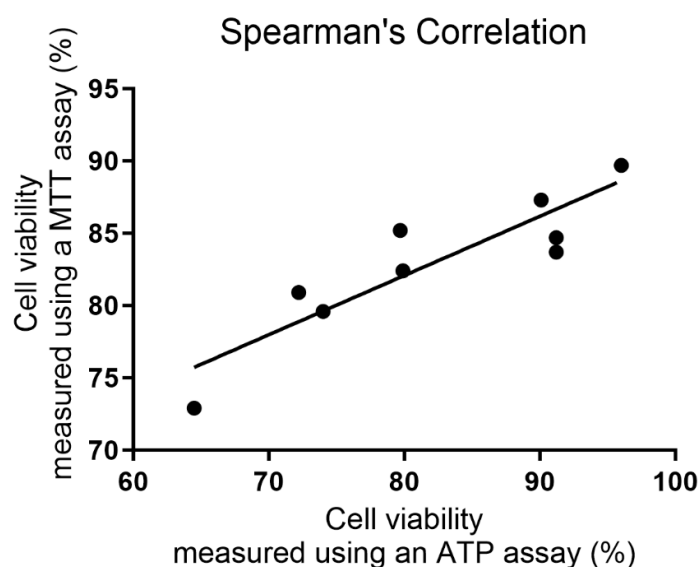

**Figure S3.** Spearman's correlation of cell viability measurements using a MTT method compared with an ATP method. Undifferentiated SH-SY5Y cells or cells differentiated to a dopaminergic or cholinergic phenotype were treated with 10  $\mu$ M paraquat, rotenone, or MPTP and the reduction of cell viability (from 100%) determined using a MTT assay or an ATP assay. A Spearman's rank correlation showed a positive (0.7950) and significant ( $p = 0.0138$ ) correlation for the different cell viability methods.

**Table S1.** Comparisons between the cytotoxic effects of paraquat (PQ), rotenone (RO), and MPTP on the different cell phenotypes. The effect of cell phenotype and the pesticide concentration on cell viability 24 hours after exposure as measured using a MTT assay was considered using a two-way ANOVA for undifferentiated human neuroblastoma cells (SH-SY5Y) and differentiated dopaminergic (DA) and cholinergic (CH) cells. For marked significance, \* $p < 0.05$ , \*\* $p < 0.01$ , \*\*\* $p < 0.001$ , and ns refers to non-significant effects.

|                | PQ       | RO  | MPTP | PQ            | RO | MPTP | PQ            | RO  | MPTP |
|----------------|----------|-----|------|---------------|----|------|---------------|-----|------|
| Interaction    | ***      | *** | *    |               |    |      |               |     |      |
| Cell phenotype | ***      | *** | ***  |               |    |      |               |     |      |
| Conc           | ***      | *** | ***  |               |    |      |               |     |      |
|                | DA vs CH |     |      | DA vs SH-SY5Y |    |      | CH vs SH-SY5Y |     |      |
| Control        | ns       | ns  | ns   | ns            | ns | ns   | ns            | ns  | ns   |
| −7.0           | **       | *** | ***  | ***           | ns | **   | ***           | *** | ns   |
| −6.0           | ns       | *** | ***  | **            | ** | ns   | ns            | *** | ns   |
| −5.0           | ns       | *** | **   | ***           | ** | ns   | ns            | *** | ns   |
| −4.0           | ***      | *** | ns   | ns            | ns | ns   | ns            | *** | ns   |
| −3.0           | **       | *** | ns   | ***           | ** | ***  | ns            | *** | ns   |

**Table S2.** Comparisons between the effects on cellular bioenergetics for paraquat (PQ), rotenone (RO), and MPTP on the different cell phenotypes. Undifferentiated SH-SY5Y cells or cells differentiated to a dopaminergic (DA) or cholinergic (CH) phenotype were treated with paraquat (PQ), rotenone (RO), or MPTP for 24 hours and the effects on ATP levels, lactate production and mitochondrial complex enzyme activities of neurotoxicant concentration on each cell phenotype evaluated using a two way ANOVA.

| Assay        | Source of variation | % of total variation | P value |
|--------------|---------------------|----------------------|---------|
| PQ ATP       | Interaction         | 4.42                 | <0.0001 |
|              | Conc                | 93.34                | <0.0001 |
|              | Phenotype           | 1.10                 | <0.0001 |
| RO ATP       | Interaction         | 2.20                 | <0.0001 |
|              | Conc                | 95.83                | <0.0001 |
|              | Phenotype           | 1.35                 | <0.0001 |
| MPTP ATP     | Interaction         | 2.42                 | <0.0001 |
|              | Conc                | 95.46                | <0.0001 |
|              | Phenotype           | 1.39                 | <0.0001 |
| PQ lactate   | Interaction         | 6.53                 | <0.0001 |
|              | Conc                | 87.86                | <0.0001 |
|              | Phenotype           | 4.83                 | <0.0001 |
| RO lactate   | Interaction         | 1.04                 | <0.0001 |
|              | Conc                | 97.88                | <0.0001 |
|              | Phenotype           | 0.80                 | <0.0001 |
| MPTP lactate | Interaction         | 2.69                 | <0.0001 |
|              | Conc                | 94.82                | <0.0001 |
|              | Phenotype           | 2.10                 | <0.0001 |
| PQ MCI       | Interaction         | 6.51                 | <0.0001 |
|              | Conc                | 64.85                | <0.0001 |
|              | Phenotype           | 5.32                 | <0.0001 |
| RO MCI       | Interaction         | 4.56                 | <0.0001 |
|              | Conc                | 85.73                | <0.0001 |
|              | Phenotype           | 0.42                 | 0.0940  |
| MPTP MCI     | Interaction         | 8.29                 | <0.0001 |
|              | Conc                | 48.65                | <0.0001 |
|              | Phenotype           | 14.75                | <0.0001 |
| PQ MCIII     | Interaction         | 0.44                 | 0.2618  |
|              | Conc                | 88.34                | <0.0001 |
|              | Phenotype           | 0.13                 | 0.4664  |
| RO MCIII     | Interaction         | 0.77                 | 0.8717  |
|              | Conc                | 11.00                | 0.0003  |
|              | Phenotype           | 4.07                 | 0.0413  |
| MPTP MCIII   | Interaction         | 24.76                | <0.0001 |
|              | Conc                | 39.73                | <0.0001 |
|              | Phenotype           | 8.18                 | <0.0001 |

**Table S3.** Comparisons between the effects on markers of oxidative stress for paraquat (PQ), rotenone (RO), and MPTP on the different cell phenotypes. Undifferentiated SH-SY5Y cells or cells differentiated to a dopaminergic (DA) or cholinergic (CH) phenotype were treated with paraquat (PQ), rotenone (RO), or MPTP for 24 hours and the effects on markers of oxidative stress of neurotoxicant concentration on each cell phenotype evaluated using a two way ANOVA.

| Assay      | Source of variation | % of total variation | P value |
|------------|---------------------|----------------------|---------|
| PQ ROS     | Interaction         | 3.81                 | <0.0001 |
|            | Conc                | 90.07                | <0.0001 |
|            | Phenotype           | 4.80                 | <0.0001 |
| RO ROS     | Interaction         | 4.30                 | <0.0001 |
|            | Conc                | 90.27                | <0.0001 |
|            | Phenotype           | 3.92                 | <0.0001 |
| MPTP ROS   | Interaction         | 4.94                 | <0.0001 |
|            | Conc                | 88.12                | <0.0001 |
|            | Phenotype           | 4.91                 | <0.0001 |
| PQ TBARS   | Interaction         | 6.21                 | <0.0001 |
|            | Conc                | 73.40                | <0.0001 |
|            | Phenotype           | 12.90                | <0.0001 |
| RO TBARS   | Interaction         | 2.82                 | <0.0001 |
|            | Conc                | 89.53                | <0.0001 |
|            | Phenotype           | 3.26                 | <0.0001 |
| MPTP TBARS | Interaction         | 3.31                 | <0.0001 |
|            | Conc                | 86.98                | <0.0001 |
|            | Phenotype           | 3.20                 | <0.0001 |
| PQ CAT     | Interaction         | 2.43                 | 0.4763  |
|            | Conc                | 85.59                | <0.0001 |
|            | Phenotype           | 0.03                 | 0.9782  |
| RO CAT     | Interaction         | 2.33                 | 0.0024  |
|            | Conc                | 86.68                | <0.0001 |
|            | Phenotype           | 1.84                 | 0.0014  |
| MPTP CAT   | Interaction         | 1.62                 | 0.1579  |
|            | Conc                | 80.21                | <0.0001 |
|            | Phenotype           | 1.03                 | 0.1213  |
| PQ SOD     | Interaction         | 4.71                 | 0.0421  |
|            | Conc                | 85.33                | <0.0001 |
|            | Phenotype           | 3.10                 | 0.0348  |
| RO SOD     | Interaction         | 1.43                 | <0.0001 |
|            | Conc                | 94.38                | <0.0001 |
|            | Phenotype           | 0.52                 | 0.0086  |
| MPTP SOD   | Interaction         | 1.26                 | 0.0100  |
|            | Conc                | 92.00                | <0.0001 |
|            | Phenotype           | 0.44                 | 0.0904  |
| PQ NrF2    | Interaction         | 4.50                 | <0.0001 |
|            | Conc                | 82.19                | <0.0001 |
|            | Phenotype           | 6.86                 | <0.0001 |
| RO NrF2    | Interaction         | 3.80                 | <0.0001 |
|            | Conc                | 84.71                | <0.0001 |
|            | Phenotype           | 3.51                 | <0.0001 |
| MPTP NrF2  | Interaction         | 10.15                | <0.0001 |
|            | Conc                | 73.18                | <0.0001 |
|            | Phenotype           | 5.85                 | <0.0001 |
